# Supplementary material for: Examining the Genetic Background of Porcine Muscle Growth and Development Based on Transcriptome and miRNAome Data
Source: PubMed Central journal article supplement (PMC5979540; doi:10.3390/ijms19041208), 2018-04-16
Supplement: ijms-19-01208-s001.pdf [file ijms-19-01208-s001.pdf]

Supplementary Figures captions:

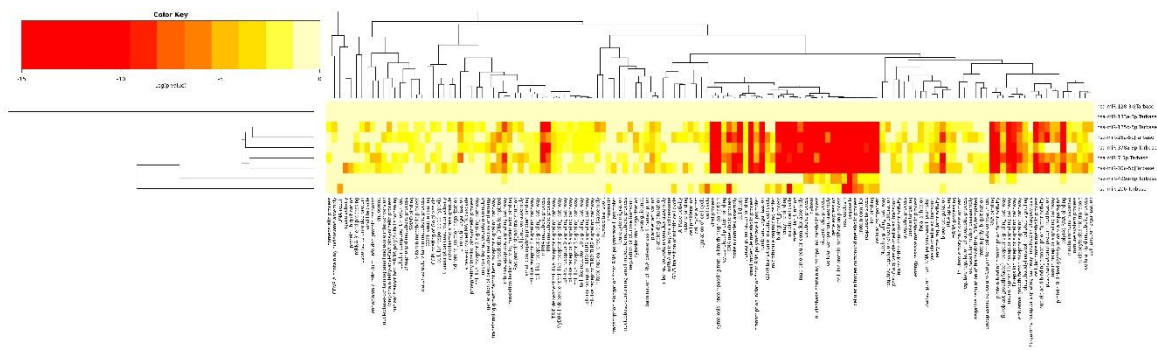

Figure S1. The identified Gene Ontology biological processes related to miRNAs up-regulated in pigs with higher muscle mass in the Hampshire breed (DIANA-miRPath v3. 0).

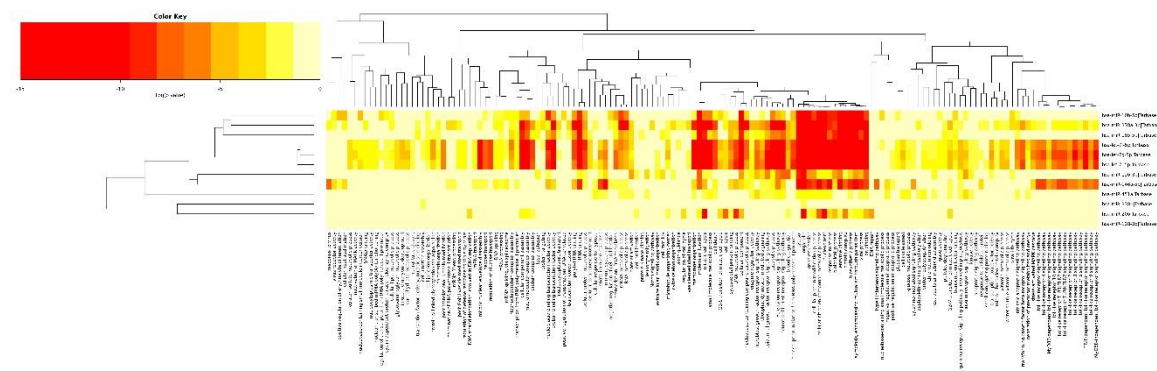

Figure S2. The identified Gene Ontology biological processes related to miRNAs up-regulated in pigs with higher muscle mass in the Hampshire breed (DIANA-miRPath v3. 0).

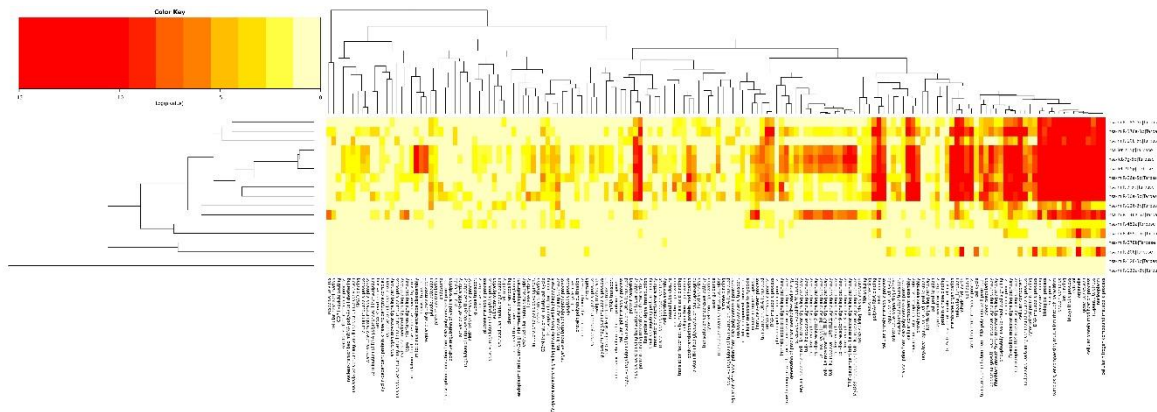

Figure S3. The identified Gene Ontology biological processes related to miRNAs up-regulated in pigs with higher muscle mass in Piertrain breed (DIANA-miRPath v3. 0).

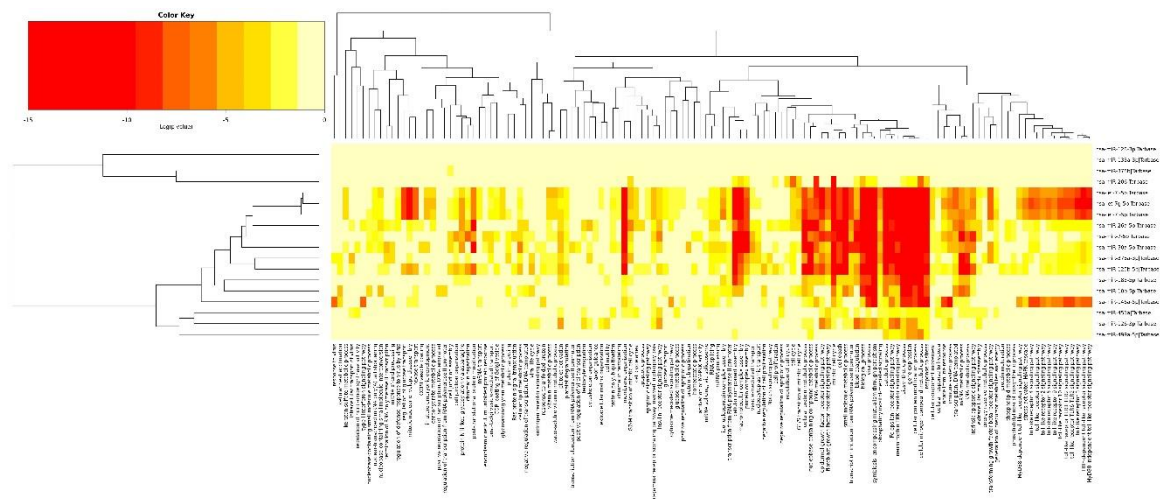

Figure S4. The identified Gene Ontology biological processes related to miRNAs down-regulated in pigs with higher muscle mass in Piertrain breed (DIANA-miRPath v3. 0).

Table S2. The details of differentially expressed genes and miRNAs selected to validation of NGS results.

| Genes         |                                                            |                     |                                                                 |                           |
|---------------|------------------------------------------------------------|---------------------|-----------------------------------------------------------------|---------------------------|
| Gene symbol   | Gene name                                                  | Accession number    | Primers                                                         | Amplification length (bp) |
| <i>MGP</i>    | Matrix Gla Protein; Cell Growth-Inhibiting Gene 36 Protein | ENSSSCG00000000606  | F<br>AGACCCTGAGAGCAACCTC<br>A<br>R<br>GGAGGCTTGTTGAGTTCTC<br>G  | 224                       |
| <i>BBS2</i>   | Biedl-Bardet- Syndrome 2                                   | ENSSSCG000000025417 | F<br>TGTGGCTCAACCAGAACTT<br>T<br>R<br>GGAAATCCGCTTCTACCTG<br>A  | 225                       |
| <i>PCOLCE</i> | Procollagen C-Endopeptidase Enhancer                       | ENSSSCG000000027466 | F<br>CCTCTCCACCCACTGACAC<br>T<br>R<br>TGGATAAGAAAGGGGTGC<br>CTA | 261                       |
| <i>COL6A1</i> | Collagen Type VI Alpha 1 Chain                             | ENSSSCG000000022506 | F<br>GCAACCTGGTGTGGAACG<br>R<br>CTTTGATGCCAGGTGCTT              | 312                       |
| <i>TBX2</i>   | T-Box 2                                                    | ENSSSCG000000027060 | F<br>AGATCGACAACAACCCGTT<br>T<br>R<br>CAGGGGACTAGGCGCTGT        | 209                       |

XPO1 Exportin 1 ENSSSCG000000 28228 F TCACAATCAAGTGAATGGT ACAGA R TTCCAGTGAGCTCTTAAAA ATCG 241

| miRNAs          |                         |                      |                 |
|-----------------|-------------------------|----------------------|-----------------|
| miRBase ID      | miRBase ID (Sus Scrofa) | miRBase Accession #  | TaqMan Assay ID |
| hsa-miR-126-3p  | ssc-miR-126-3p          | MIMAT0018378 (pig)   | 477887_mir      |
| hsa-miR-378a-3p | ssc-miR-378             | MIMAT0013868 (pig)   | 478349_mir      |
| hsa-let-7g-5p   | ssc-let-7g              | MIMAT0013867 (pig)   | 478580_mir      |
| hsa-miR-30a-5p  | ssc-miR-30a-5p          | MIMAT0010193 (pig)   | 479448_mir      |
| hsa-miR-451a    | ssc-miR-451             | MIMAT0018382 (pig)   | 478107_mir      |
| hsa-miR-125b-5p | ssc-miR-125b            | MIMAT0002120 (pig)   | 477885_mir      |
| hsa-miR-7-5p    | ssc-miR-7               | MIMAT0000252 (human) | 478341_mir      |
| hsa-miR-499a-5p | ssc-miR-499-5p          | MIMAT0013877 (pig)   | 478139_mir      |
| hsa-miR-103a-3p | ssc-miR-103             | MIMAT0002154 (pig)   | 478253_mir      |
| hsa-miR-20a-5p  | ssc-miR-20a             | MIMAT0000075 (human) | 478586_mir      |

**Table S1.** The 43 DEGs identified in both breeds between groups differing in meat content.

| Gene Accession number | Gene symbol   | Hp FC | adj pval | Pi FC | adj pval |
|-----------------------|---------------|-------|----------|-------|----------|
| ENSSSCG00000017674    | <i>MED13</i>  | -2.39 | 5.94E-11 | -1.39 | 0.002140 |
| ENSSSCG00000015311    | <i>CYP51</i>  | -2.27 | 5.24E-08 | -1.41 | 0.007487 |
| ENSSSCG00000006066    | <i>RNF19A</i> | -2.10 | 1.84E-10 | -1.31 | 0.006446 |

|                    |                       |       |          |       |          |
|--------------------|-----------------------|-------|----------|-------|----------|
| ENSSSCG0000007830  | <i>RBBP6</i>          | -2.06 | 6.78E-12 | -1.25 | 0.033282 |
| ENSSSCG00000028035 | <i>ZC3H11A</i>        | -2.04 | 5.09E-12 | -1.24 | 0.038055 |
| ENSSSCG0000009061  | <i>NAA15</i>          | -2.03 | 3.68E-12 | -1.23 | 0.025751 |
| ENSSSCG00000028228 | <i>protein_coding</i> | -1.93 | 4.62E-06 | -1.30 | 0.014457 |
| ENSSSCG00000011332 | <i>SETD2</i>          | -1.87 | 3.00E-09 | -1.27 | 0.016705 |
| ENSSSCG00000003670 | <i>RLF</i>            | -1.80 | 3.23E-06 | -1.25 | 0.045695 |
| ENSSSCG00000022419 | <i>FEM1B</i>          | -1.74 | 2.50E-05 | -1.25 | 0.031716 |
| ENSSSCG00000008487 | <i>ATL2</i>           | -1.72 | 7.57E-06 | -1.34 | 0.013031 |
| ENSSSCG00000004103 | <i>PCMT1</i>          | -1.46 | 0.002628 | -1.26 | 0.039723 |
| ENSSSCG00000026934 | <i>PIGX</i>           | -1.27 | 0.24488  | -1.36 | 0.021497 |
| ENSSSCG00000026182 | <i>protein_coding</i> | 1.14  | 0.646066 | 1.54  | 0.003136 |
| ENSSSCG00000014565 | <i>protein_coding</i> | 1.16  | 0.582601 | 1.34  | 0.048292 |
| ENSSSCG00000029147 | <i>protein_coding</i> | 1.29  | 0.356686 | 1.41  | 9.87E-07 |
| ENSSSCG00000017428 | <i>JUP</i>            | 1.31  | 0.134578 | 1.39  | 0.025119 |
| ENSSSCG00000027946 | <i>MVP</i>            | 1.32  | 0.033742 | 1.53  | 0.002281 |
| ENSSSCG00000025417 | <i>BBS2</i>           | 1.37  | 0.127142 | 1.35  | 0.022786 |
| ENSSSCG00000008349 | <i>CNRIP1</i>         | 1.42  | 0.020235 | 1.42  | 0.001871 |
| ENSSSCG00000022506 | <i>COL6A1</i>         | 1.46  | 0.17294  | 1.37  | 0.032944 |
| ENSSSCG00000003201 | <i>ATF5</i>           | 1.51  | 0.041036 | 1.54  | 0.003205 |
| ENSSSCG00000011129 | <i>ITIH5</i>          | 1.67  | 0.000236 | 1.38  | 0.011175 |
| ENSSSCG00000028022 | <i>COL6A2</i>         | 1.71  | 0.05198  | 1.36  | 0.029189 |
| ENSSSCG00000026631 | <i>SLC25A6</i>        | 1.73  | 2.74E-06 | 1.35  | 0.028352 |
| ENSSSCG00000027060 | <i>TBX2</i>           | 1.73  | 0.004374 | 1.39  | 0.026113 |
| ENSSSCG00000026084 | <i>MFSD7</i>          | 1.74  | 0.000551 | 1.41  | 0.019689 |
| ENSSSCG00000012953 | <i>YIF1A</i>          | 1.77  | 6.74E-08 | 1.33  | 0.038407 |
| ENSSSCG00000000033 | <i>BZRP</i>           | 1.82  | 0.03506  | 1.45  | 0.008436 |
| ENSSSCG00000013901 | <i>IFI30</i>          | 1.82  | 0.025505 | 1.37  | 0.035551 |
| ENSSSCG00000022246 | <i>ICOSLG</i>         | 1.83  | 0.001045 | 1.39  | 0.017888 |
| ENSSSCG00000013622 | <i>TMEM205</i>        | 1.83  | 2.45E-05 | 1.38  | 0.022633 |
| ENSSSCG00000009668 | <i>CLU</i>            | 1.92  | 0.000132 | 1.45  | 0.008532 |
| ENSSSCG00000008508 | <i>FAM98A</i>         | 1.95  | 2.27E-07 | 1.22  | 0.042541 |
| ENSSSCG00000000675 | <i>C1R</i>            | 1.99  | 3.56E-06 | 1.39  | 0.004673 |
| ENSSSCG00000022236 | <i>protein_coding</i> | 2.01  | 0.008151 | 1.53  | 0.003243 |
| ENSSSCG00000000606 | <i>MGP</i>            | 2.04  | 0.008139 | 1.30  | 0.029075 |
| ENSSSCG00000013074 | <i>RAB3IL1</i>        | 2.16  | 5.39E-05 | 1.59  | 0.001274 |
| ENSSSCG00000027466 | <i>PCOLCE</i>         | 2.23  | 0.001512 | 1.27  | 0.033010 |
| ENSSSCG00000013181 | <i>SERPING1</i>       | 2.38  | 6.82E-07 | 1.27  | 0.029674 |
| ENSSSCG00000012841 | <i>ATGL</i>           | 2.39  | 6.54E-08 | 1.40  | 0.013320 |
| ENSSSCG00000006276 | <i>CEBPD</i>          | 2.57  | 3.62E-10 | 1.38  | 0.023386 |
| ENSSSCG00000014834 | <i>UCP3</i>           | 2.73  | 3.76E-09 | 1.68  | 0.000316 |

Hp – Hampshire; Pi – Pietrain; FC – fold change obtained for DEGs between different phenotypic groups in each breed
